# Supplementary material
Source: PubMed Central journal article supplement (PMC2714939)
Supplement: tpc.109.066878_1.pdf [file tpc.109.066878_1.pdf]

Supplemental Data. Dong et al. 2009. Crystal structure of the complex between *Pseudomonas* effector AvrPtoB and the tomato Pto kinase reveals both a shared and a unique interface compared with AvrPto-Pto.

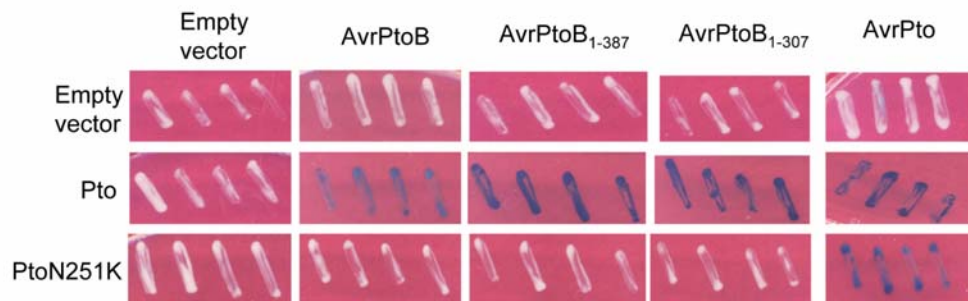

**Supplemental Figure 1. Pto N251K interacts with AvrPto but not AvrPtoB as determined by a yeast two-hybrid assay**

Various constructs of AvrPtoB as indicated and AvrPto were expressed from the prey vector pJG4-5, whereas Pto (wild type) and the mutant N251K were expressed from the bait pEG202 vector. Positive interactions are indicated by blue patches.

**Supplemental Table 1: Primers used for expression of *AvrPtoB* and *Pto*.**

The underlined sequences are the restriction enzyme (on the last column) cutting sites.

|                                   |                                                 |               |
|-----------------------------------|-------------------------------------------------|---------------|
| AvrPtoB <sub>121-205</sub> -WT    | 5'-GAAATT <u>GGATCCCC</u> CGTAGAGGGGCGGTT-3'    | <i>Bam</i> HI |
|                                   | 3'-AAATT <u>CTCGAGT</u> CATGACGCCGCCTGTTGGTG-5' | <i>Xho</i> I  |
| AvrPtoB <sub>121-205</sub> -V159D | 5'-GACGCAGATGCTTTTTC-3'                         |               |
|                                   | 3'-AGAAAAAGCATCTGCGTCGC-5'                      |               |
| AvrPtoB <sub>121-205</sub> -A158D | 5'-AATGGCGACGTCGCTTTT-3'                        |               |
|                                   | 3'-AAAAGCGACGTCGTCGCCATT-5'                     |               |
| AvrPtoB <sub>121-205</sub> -A160D | 5'-GACGCAGTCGACTTTTCTCG-3'                      |               |
|                                   | 3'-TCGAGAAAAGTCGACTGCG-5'                       |               |
| AvrPtoB <sub>121-205</sub> -D157A | 5'-ATGAATGGCGCGGCAGTCGC-3'                      |               |
|                                   | 3'-AGCGACTGCCGCGCCATTC-5'                       |               |
| AvrPtoB <sub>121-205</sub> -P174A | 5'-CATTTCCGCAACATGCC-3'                         |               |
|                                   | 3'-GGGCATGTTGGCGAAATGC-5'                       |               |
| AvrPtoB <sub>121-205</sub> -M176  | 5'-CCGAACGACCCCATGC-3'                          |               |
|                                   | 3'-CATGGGGTCGTTCCGGG-5'                         |               |
| AvrPtoB <sub>121-205</sub> -P177A | 5'-AACATGGCGATGCATCG-3'                         |               |
|                                   | 3'-ATGCATCGCCATGTTGG-5'                         |               |
| AvrPtoB <sub>121-205</sub> -I181D | 5'-ATGCATGGAGACAGCCG-3'                         |               |
|                                   | 3'-TCGGCTGTCTCCATGC-5'                          |               |
| Pto-WT                            | 5'-GAAATTCATAT <u>GATGGGA</u> AGCAAGTATTCT-3'   | <i>Nde</i> I  |
|                                   | 3'-GAAATTC <u>TCGAGA</u> AATAACAGACTCTTGGAG-5'  | <i>Xho</i> I  |
| Pto -R163A                        | 5'-ATTATACATGCTGATGTCAAG-3'                     |               |
|                                   | 3'-CTTGACATCAGCATGTATAAT-5'                     |               |
| Pto -L205A                        | 5'-AAAGGAACTGCCGGCTACATT-3'                     |               |
|                                   | 3'-AATGTAGCCGGCAGTTCCTTT-5'                     |               |
| Pto -K215D                        | 5'-TATTTTATAGACGGACGACTC-3'                     |               |
|                                   | 3'-GAGTCGTCCGTCTATAAAATA-5'                     |               |
| Pto -T199A                        | 5'-CATCTTAGCGCAGTAGTGAAG-3'                     |               |
|                                   | 3'-TTTCACTACTGCGCTAAGATG-5'                     |               |
| Pto -V242D                        | 5'-TCTGCCATAGACCAATCTC-3'                       |               |
|                                   | 3'-AGATTGGTCTATGGCAG-5'                         |               |

**Supplemental Table 2: Primers used for yeast two hybrid assays**

|                                 |                                                     |
|---------------------------------|-----------------------------------------------------|
| Pto-H49E/V51D                   | 5'-AAGTTTTTAATTGGAGAAGGTGACTTTGGGAAGGTTTAC-3'       |
|                                 | 5'-GTAAACCTTCCCAAAGTCACCTTCTCCAATTA AAAACTT-3'      |
| Pto-L205A/F213A                 | 5'-AAAGGAACTGCCGGCTACATTGACCCTGAATATGCTATAAAGGGA-3' |
|                                 | 5'-TCCCTTTATAGCATATTCAGGGTCAATGTAGCCGGCAGTTCCTTT-3' |
| Pto-K215D                       | 5'-CCTGAATATTTTATAGATGGACGACTCACTGAA-3'             |
|                                 | 5'-TTCAGTGAGTCGTCCATCTATAAAATATTCAGG-3'             |
| Pto-V242D                       | 5'-GCTAGGTCTGCCATAGATCAATCTCTTCCAAGG-3'             |
|                                 | 5'-CCTTGGAAAGAGATTGATCTATGGCAGACCTAGC-3'            |
| Pto-V242W                       | 5'-GCTAGGTCTGCCATATGGCAATCTCTTCCAAGG-3'             |
|                                 | 5'-CCTTGGAAAGAGATTGCCATATGGCAGACCTAGC-3'            |
| Pto-I241D                       | 5'-TGTGCTAGGTCTGCCGATGTTCAATCTCTTCCA-3'             |
|                                 | 5'-TGGAAGAGATTGAACATCGGCAGACCTAGCACA-3'             |
| Pto-V229D                       | 5'-GTTTATTCTTTCCGGTGATGTTTTATTCTGAAGTT-3'           |
|                                 | 5'-AACTTCGAATAAAACATCACCGAAAGAATAAAC-3'             |
| Pto-W255D                       | 5'-GTTAATTTAGCTGAAGATGCAGTGGAGTCGCAT-3'             |
|                                 | 5'-ATGCGACTCCACTGCATCTTCAGCTAAATTAAC-3'             |
| Pto-R238A                       | 5'-GAAGTTCTTTGTGCTGCGTCTGCCATAGTTCAA-3'             |
|                                 | 5'-TTGAACTATGGCAGACGCAGCACAAAGAACTTC-3'             |
| Pto-L205A                       | 5'-GTGAAAGGAACTGCCGGCTACATTGACCCTGAA-3'             |
|                                 | 5'-TTCAGGGTCAATGTAGCCGGCAGTTCCTTTCAC-3'             |
| Pto-F213A                       | 5'-ATTGACCCTGAATATGCTATAAAGGGACGACTC-3'             |
|                                 | 5'-GAGTCGTCCCTTTATAGCATATTCAGGGTCAAT-3'             |
| Pto-N251K                       | 5'-CCAAGGGAGATGGTTAAATTAGCTGAAGATGCA-3'             |
|                                 | 5'-TGCATCTTCAGCTAATTTAACCATCTCCCTTGG -3'            |
| AvrPtoB <sub>1-307</sub> -D157A | 5'-AATGCAATGAATGGCGCCGACGTCGCTTTTTCT-3'             |
|                                 | 5'-AGAAAAAGCGACTGCGGCGCCATTCATTGCATT-3'             |
| AvrPtoB <sub>1-307</sub> -A158D | 5'-GCAATGAATGGCGACGACGTCGCTTTTTCTCGA-3'             |
|                                 | 5'-TCGAGAAAAAGCGACGTCGTCGCCATTCATTGC-3'             |
| AvrPtoB <sub>1-307</sub> -V159D | 5'-ATGAATGGCGACGCAGACGCTTTTTCTCGAGTA-3'             |
|                                 | 5'-TACTCGAGAAAAAGCGTCTGCGTCGCCATTCAT-3'             |
| AvrPtoB <sub>1-307</sub> -A160D | 5'-AATGGCGACGCAGTCGACTTTTTCTCGAGTAGAA-3'            |
|                                 | 5'-TTCTACTCGAGAAAAGTCGACTGCGTCGCCATT-3'             |
| AvrPtoB <sub>1-307</sub> -P174D | 5'-TTTCGCCAGCATTTTCGACAACATGCCCATGCAT-3'            |
|                                 | 5'-ATGCATGGGCATGTTGTGCGAAATGCTGGCGAAA-3'            |
| AvrPtoB <sub>1-307</sub> -M176D | 5'-CAGCATTTCCCGAACGACCCCATGCATGGAATC-3'             |
|                                 | 5'-GATTCCATGCATGGGGTCGTTTCGGGAAATGCTG-3'            |
| AvrPtoB <sub>1-307</sub> -P177A | 5'-CATTTCCCGAACATGGCCATGCATGGAATCAGC-3'             |
|                                 | 5'-GCTGATTCCATGCATGGCCATGTTTCGGGAAATG-3'            |
| AvrPtoB <sub>1-307</sub> -I181D | 5'-ATGCCCATGCATGGAGACAGCCGAGATTCGGAA-3'             |
|                                 | 5'-TTCCGAATCTCGGCTGTCTCCATGCATGGGCAT-3'             |
